# Supplementary material for: Synthesis of a water-soluble 2,2′-biphen[4]arene and its efficient complexation and sensitive fluorescence enhancement towards palmatine and berberine
Source: publisher site journal article supplement (doi:10.3762/bjoc.14.198), 2018-08-27
Supplement: Additional file 1 [file 1860-5397-14-198-S1.pdf]

**Supporting Information**  
**for**  
**Synthesis of a water-soluble 2,2'-biphen[4]arene**  
**and its efficient complexation and sensitive**  
**fluorescence enhancement towards palmatine**  
**and berberine**

Xiayang Huang,<sup>1,2</sup> Xinghua Zhang,\*<sup>1</sup> Tianxin Qian,<sup>2</sup> Junwei Ma,<sup>2</sup> Lei Cui<sup>2</sup>  
and Chunju Li\*<sup>1,2</sup>

Address: <sup>1</sup>School of Chemical and Environmental Engineering, Shanghai  
Institute of Technology, 100 Hai-Quan Road, Shanghai 201418, P. R. China  
and <sup>2</sup>Department of Chemistry, Center for Supramolecular Chemistry and  
Catalysis, Shanghai University, Shanghai 200444, P. R. China

Email: Xinghua Zhang - xhzhang@sit.edu.cn; Chunju Li - cjli@shu.edu.cn

\*Corresponding author

**Experimental details and the <sup>1</sup>H and <sup>13</sup>C NMR spectra of**  
**2,2'-biphen[4]arene derivatives, additional <sup>1</sup>H NMR spectra of host-guest**  
**mixture, job plots, and the determination of the association constants.**

1. Synthesis.
2. <sup>1</sup>H NMR and <sup>13</sup>C NMR spectra of new 2,2'-biphen[4]arene compounds.
3. <sup>1</sup>H NMR spectra of **P** in the absence and presence of **2,2'-CBP4**.
4. 2D NOESY spectra of host-guest mixture of **P/B** with **2,2'-CBP4**.
5. Determination of the association constants.

## 1. Synthesis

**2,2'-CBP4** was synthesized in a similar manner to a procedure of water-soluble 4,4'-biphenylene [Ref 46 in the manuscript: Org. Lett. 2016, 18, 5740–5743].

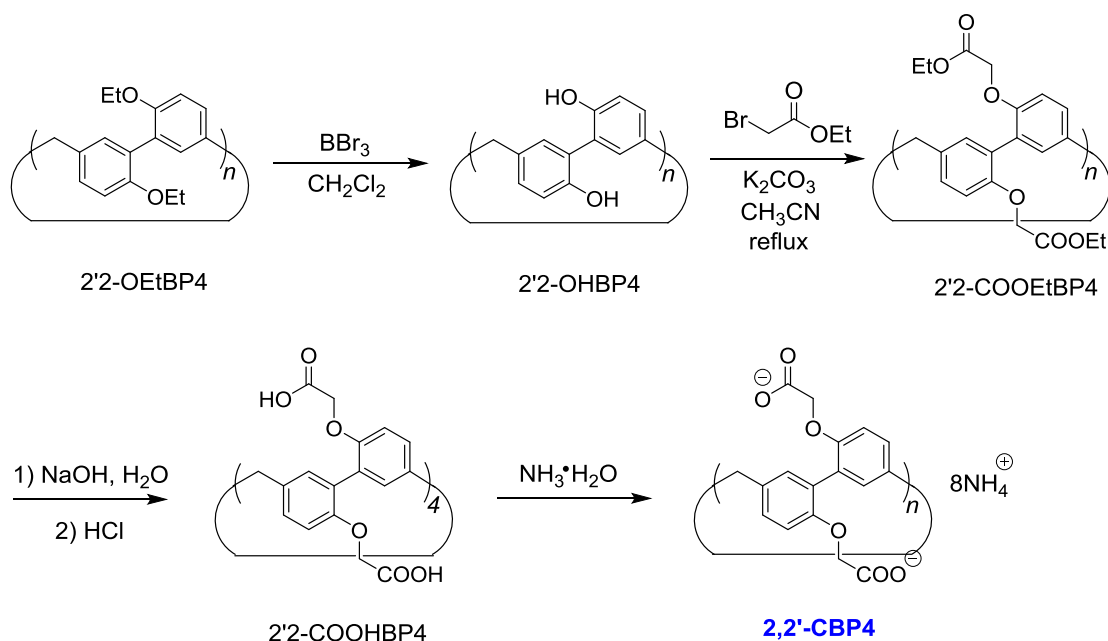

Synthetic route of **2,2'-CBP4**.

**2,2'-OHBP4.** To a solution of **2,2'-OEtBP4** (510 mg, 0.50 mmol) in chloroform (30 mL) was added excess boron tribromide (2.5 g, 10 mmol). The reaction mixture was stirred at room temperature for 6 h. Then the mixture was poured into ice water. The resulting precipitate was collected by filtration and washed with cold water to quantitatively obtain **2,2'-OHBP4** (390 mg). **2,2'-OHBP4**. m.p. 229–230 °C.  $^1\text{H}$  NMR (500 MHz, acetone- $d_6$ ):  $\delta$  (ppm): 8.26 (d  $J$  = 2.16 Hz, 8H), 7.18 (d,  $J$  = 2.12 Hz, 8 H), 7.06 (dd,  $J$  = 8.25, 2.23 Hz, 8H), 6.88 (d, 8.25Hz, 8H), 3.90 (s, 8H).  $^{13}\text{C}$  NMR (125 MHz, Acetone- $d_6$ ):  $\delta$  (ppm): 152.93, 134.66, 132.92, 129.87, 127.18, 117.42, 40.73. HRMS (ESI):  $\text{C}_{52}\text{H}_{40}\text{O}_8\text{H}^+$ , calcd  $m/z$  793.2796; found  $m/z$  793.2796.

**2,2'-COOEtBP4.** **2,2'-OHBP4** (1.58 g, 2.0 mmol) was dissolved in  $\text{CH}_3\text{CN}$  (50 mL), and  $\text{K}_2\text{CO}_3$  (4.10 g, 30 mmol) was added. The reaction mixture was stirred for 1 h under nitrogen atmosphere. Then ethyl bromoacetate (3.40 g, 20

mmol) was added. The mixture was heated at 80 °C for 24 hours. The reaction mixture was cooled to room temperature and filtered. The filter cake was washed with dichloromethane (60 mL × 2). The solvent was removed under vacuum. The resulting residue was dissolved in dichloromethane (60 mL), and extracted with water (30 mL × 2). The organic layer was dried using anhydrous Na<sub>2</sub>SO<sub>4</sub> and concentrated. The residue was purified by recrystallization in *n*-pentane and chloroform to afford 2,2'-COOEtBP4 as a white solid (2.60 g, 88%). m.p. 183–184 °C <sup>1</sup>H NMR (500 MHz, CD<sub>2</sub>Cl<sub>2</sub>): δ (ppm): 7.18 (dd, *J* = 2.23, 8.35 Hz, 8H), 7.08 (d, *J* = 2.13 Hz, 8H), 6.78 (d, *J* = 8.51 Hz, 8H), 4.60 (s, 16H), 4.18 (q, *J* = 6.99, 14.28 Hz, 16H), 4.07 (s, 8H), 1.25 (t, *J* = 6.99, 13.98 Hz, 24H). <sup>13</sup>C NMR (125 MHz, CD<sub>2</sub>Cl<sub>2</sub>): δ (ppm): 170.42, 154.52, 135.25, 132.61, 129.25, 128.21, 112.72, 66.51, 61.28, 40.51, 15.02. HRMS (ESI): C<sub>84</sub>H<sub>88</sub>O<sub>24</sub>NH<sub>4</sub><sup>+</sup>, calcd *m/z* 1498.5982; found *m/z* 1498.5970.

**2,2'-COOHBP4.** A solution of 2,2'-COOEtBP4 (1.48 g, 1.0 mmol) in THF (20 mL) was stirred with 40% aqueous sodium hydroxide (20 mL) at 65 °C for 10 h. THF was then removed by evaporation under vacuum. The residue was diluted with deionized water (20 mL) and acidified with hydrochloric acid. The white cotton-like precipitate was collected by filtration, washed with cold water (10 mL × 3) and dried under vacuum to get 2,2'-COOHBP4 as white solid (1.09 g, 87%). m.p. > 320 °C. <sup>1</sup>H NMR (500 MHz, DMSO): δ (ppm): 13.02 (br, 8H), 7.24 (d, *J* = 8.42 Hz, 8H), 7.07 (s, 8H), 6.7 (d, *J* = 8.42 Hz, 8H), 4.69 (s, 16H), 3.97 (s, 8H). <sup>13</sup>C NMR (125 MHz, DMSO): δ (ppm): 170.58, 153.72, 133.68, 131.73, 128.33, 127.14, 112.48, 65.57. C<sub>68</sub>H<sub>56</sub>O<sub>24</sub>H<sup>+</sup>, calcd *m/z* 1257.3235; found *m/z* 1257.3237.

**2,2'-CBP4.** 2,2'-COOHBP4 (1.27 g, 1.0 mmol) and 20 mL of ammonium hydroxide solution (25–28%) were stirred at room temperature for 4 h. The solvent was then removed by rotary evaporation to quantitatively obtain 2,2'-CBP4 as a white solid (1.40 g, 100%). m.p. > 320 °C. <sup>1</sup>H NMR (500 MHz, D<sub>2</sub>O): δ (ppm): 7.22 (s, 8H), 7.07 (s, 8H), 6.81 (s, 8H), 4.17 (s, 16H), 3.83 (s,

8H).  $^{13}\text{C}$  NMR (125 MHz,  $\text{D}_2\text{O}$ ):  $\delta$  (ppm): 176.39, 153.58, 134.57, 131.73, 129.18, 127.19, 113.45, 67.87, 39.16.

## 2. $^1\text{H}$ NMR and $^{13}\text{C}$ NMR spectra of new 2,2'-biphen[4]arene compounds.

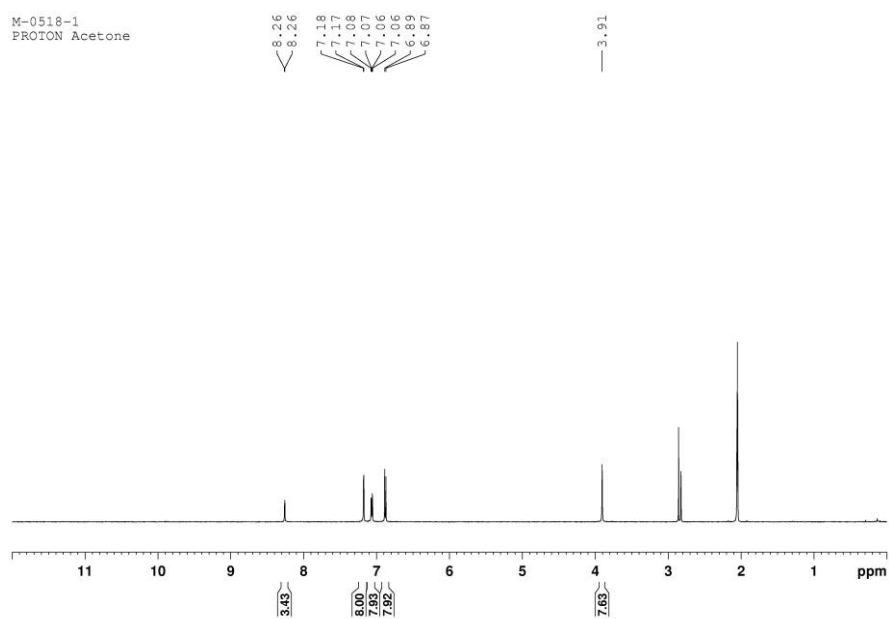

**Figure S1**  $^1\text{H}$  NMR spectrum (500 MHz) of 2,2'-OHBP4 in  $(\text{CD}_3)_2\text{CO}$ .

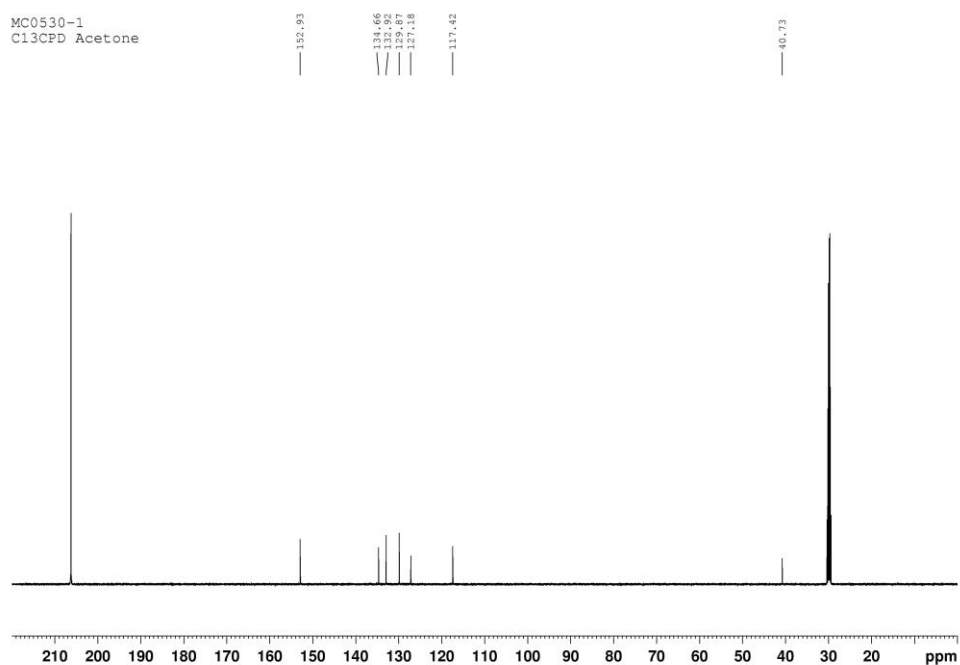

**Figure S2**  $^{13}\text{C}$  NMR spectrum (125 MHz) of 2,2'-OHBP4 in  $(\text{CD}_3)_2\text{CO}$ .

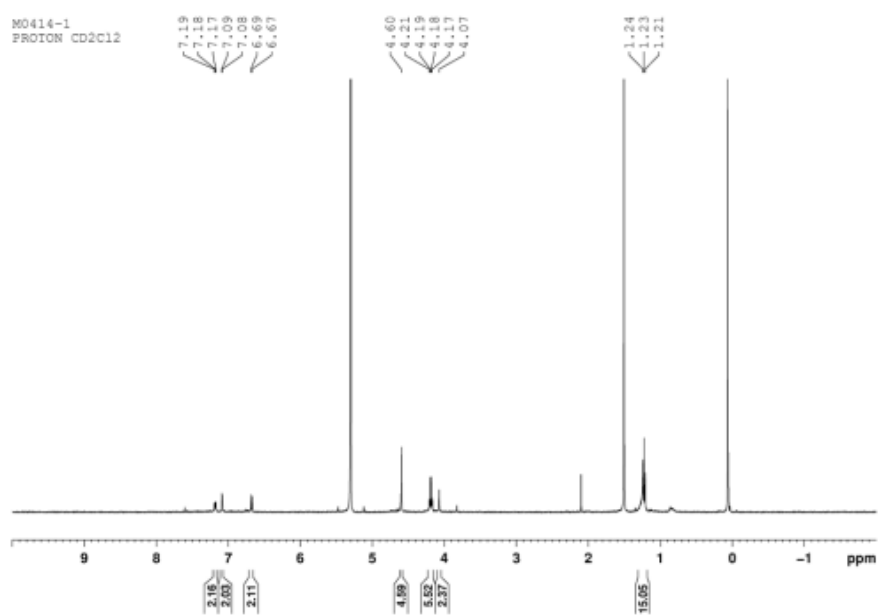

**Figure S3**  $^1\text{H}$  NMR spectrum (500 MHz) of 2,2'-COOEtBP4 in  $\text{CD}_2\text{Cl}_2$ .

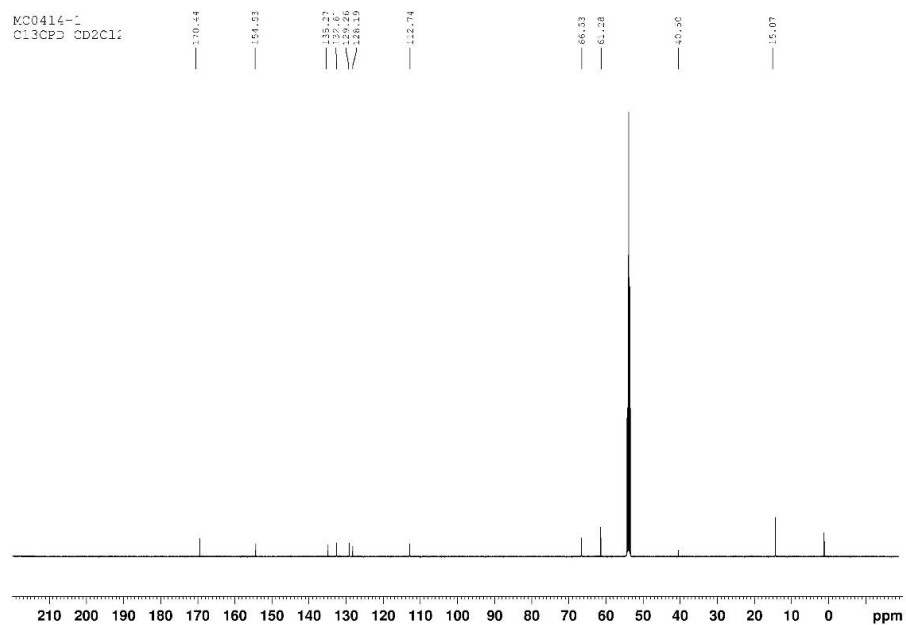

**Figure S4**  $^{13}\text{C}$  NMR spectrum (125 MHz) of 2,2'-COOEtBP4 in  $\text{CD}_2\text{Cl}_2$ .

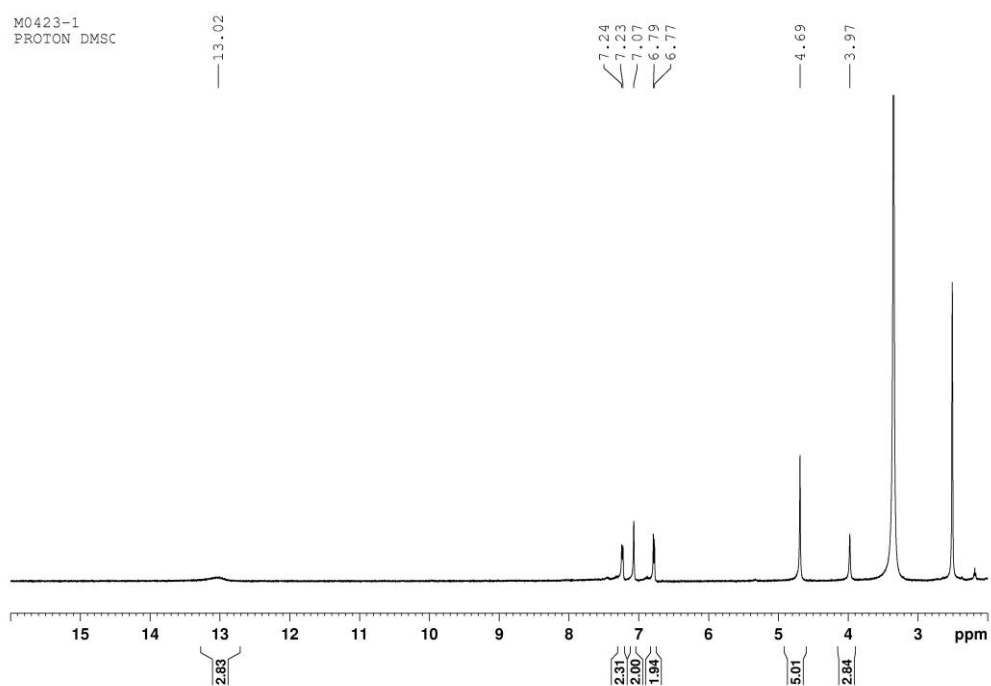

**Figure S5**  $^1\text{H}$  NMR spectrum (500 MHz) of 2,2'-COOHBP4 in  $\text{DMSO-}d_6$ .

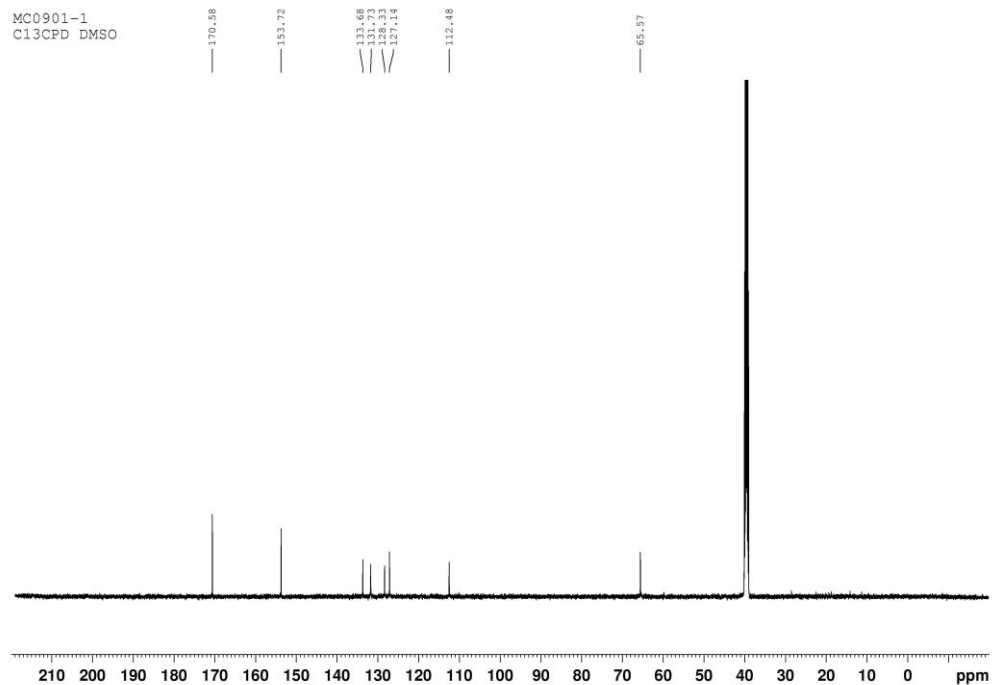

**Figure S6**  $^{13}\text{C}$  NMR spectrum (125 MHz) of 2,2'-COOHBP4 in  $\text{DMSO-}d_6$ .

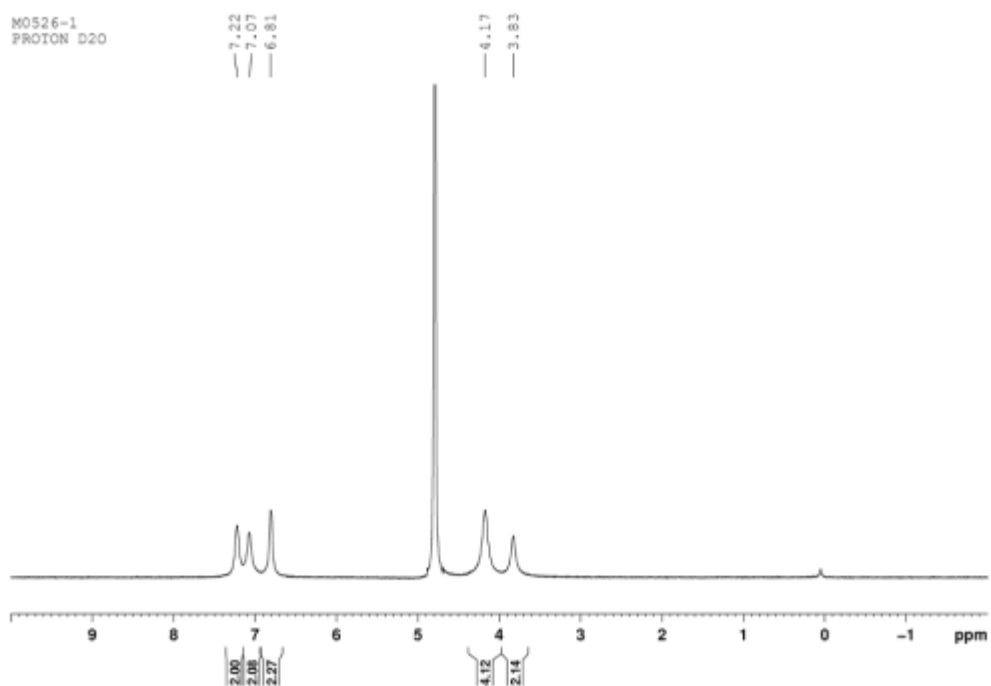

**Figure S7**  $^1\text{H}$  NMR spectrum (500 MHz) of **2,2'-CBP4** in  $\text{D}_2\text{O}$ .

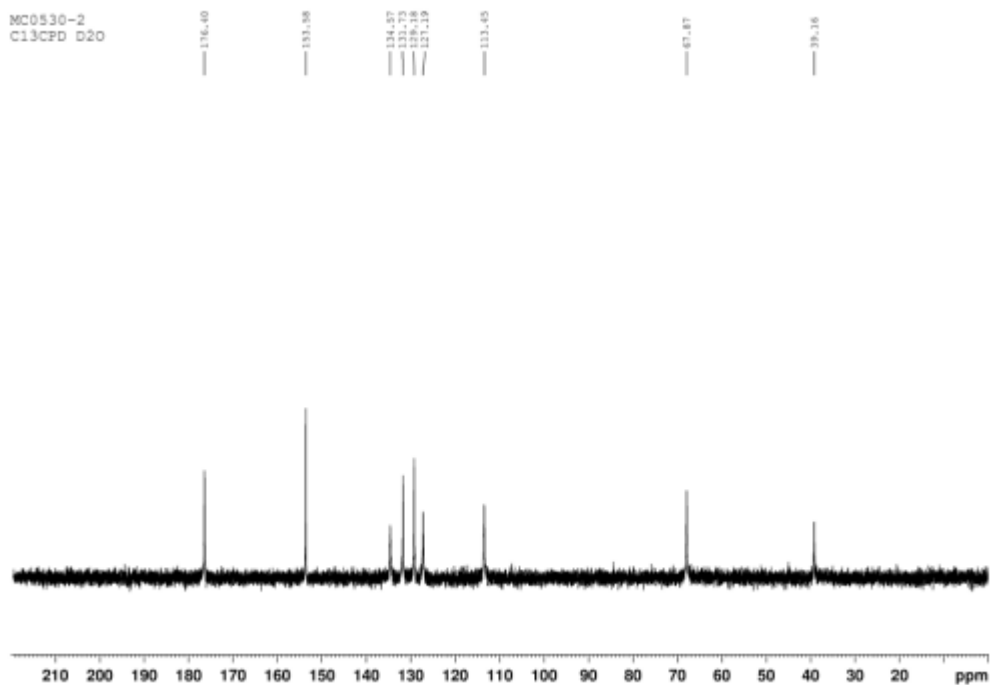

**Figure S8**  $^{13}\text{C}$  NMR spectrum (125 MHz) of **2,2'-CBP4** in  $\text{D}_2\text{O}$ .



### 3. $^1\text{H}$ NMR spectra of **P** in the absence and presence of 2,2'-CBP4.

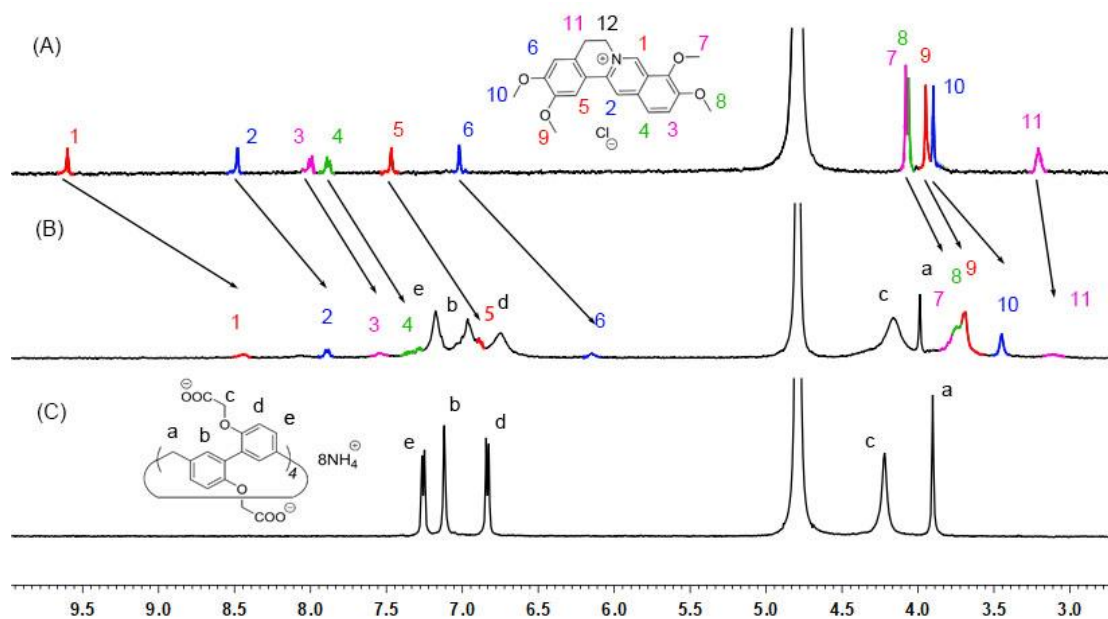

**Figure S9**  $^1\text{H}$  NMR spectra (500 MHz, 293 K) of (A) **P** (2.0 mM), (B) **P** (2.0 mM) + 2,2'-CBP4 (2.0 mM) and (C) 2,2'-CBP4 (2.0 mM) in deuterated phosphate buffer (pD = 7.4).

#### 4. 2D NOESY spectra of host-guest mixture of P/B with 2,2'-CBP4.

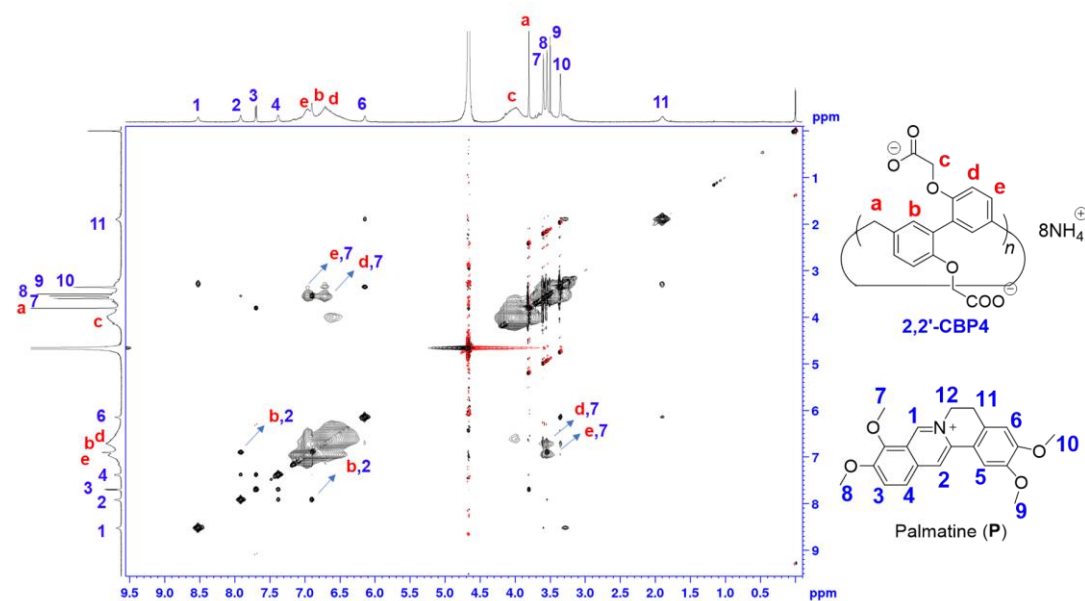

**Figure S10** 2D NOESY analysis (600 MHz, 293 K) of **P** (7.5 mM) with 2,2'-CBP4 (5.0 mM) in deuterated phosphate buffer (pD = 7.4) with a mixing time of 600 ms.

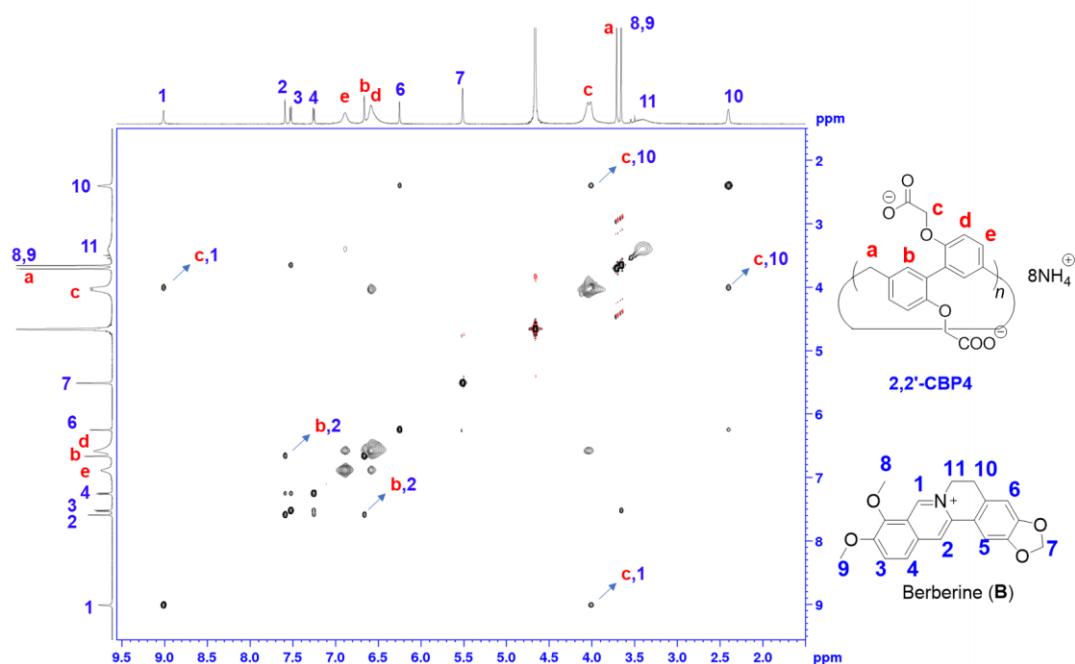

**Figure S11** 2D NOESY analysis (600 MHz, 293 K) of **B** (7.5 mM) with 2,2'-CBP4 (5.0 mM) in deuterated phosphate buffer (pD = 7.4) with a mixing time of 600 ms.

## 5. Determination of the association constants

The presence of 2,2'-CBP4 could enhance **P** or **B**'s fluorescence, so the association constants ( $K_a$ ) could be calculated by analyzing the fluorescence emission changes of the guest that occurred with changes in host concentration. Using the nonlinear curve-fitting method, the association constant was obtained for host–guest combination from the following equation:

$$I = I_0 - (0.5((G_0/2 + [\text{host}] + (1/K_a)) - (\sqrt{((G_0/2 + [\text{host}] + (1/K_a))(G_0/2 + [\text{host}] + (1/K_a)) - 4 G_0/2X})))$$

Where  $I$  is the fluorescence intensity of the system,  $I_0$  is the intensity of the guest in the absence of 2,2'-CBP4,  $[\text{host}]$  is the initial concentration of 2,2'-CBP4.

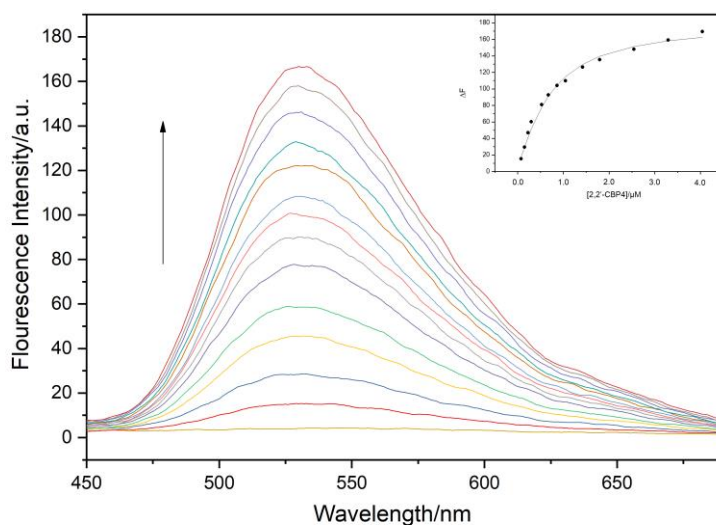

**Figure S12** Fluorescence spectra of **B** in the absence and presence of 2,2'-CBP4 in aqueous phosphate buffer solution at pH 7.4 at 298 K. The excitation wavelength is at 352.0 nm. Inset: the nonlinear least-squares analysis to calculate the association constant.

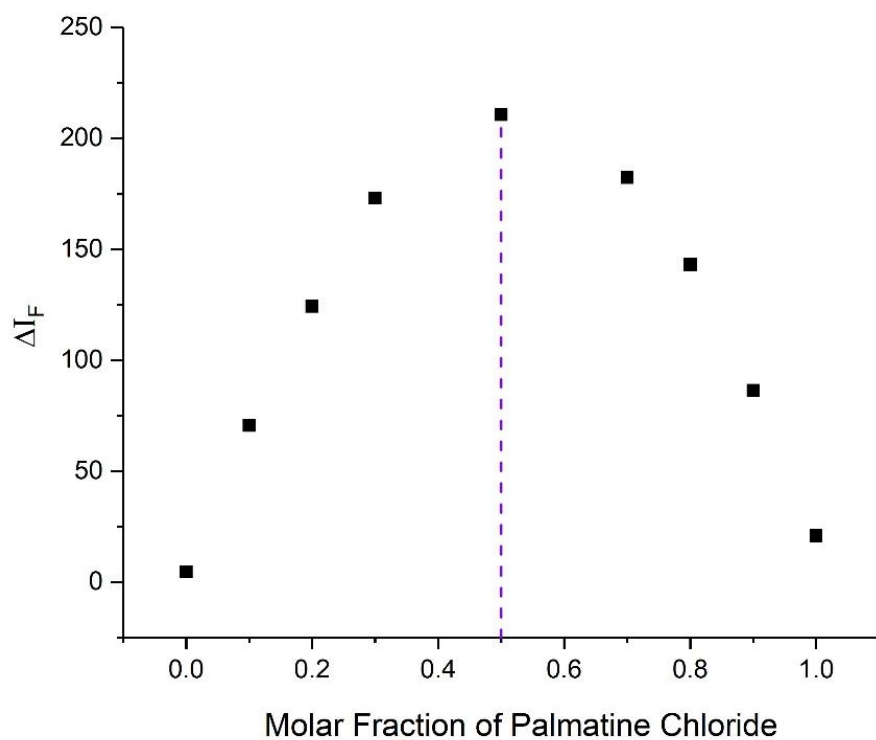

**Figure S13** Job plot showing the 1:1 stoichiometry of the complex between **P** and 2,2'-CBP4 in pH 7.4 buffer by plotting the  $\Delta I_F$  values against the mole fraction of **P** ( $[\mathbf{P}] + [2,2'\text{-CBP4}] = 1.0 \times 10^{-5} \text{ M}$ ) at 298 K.

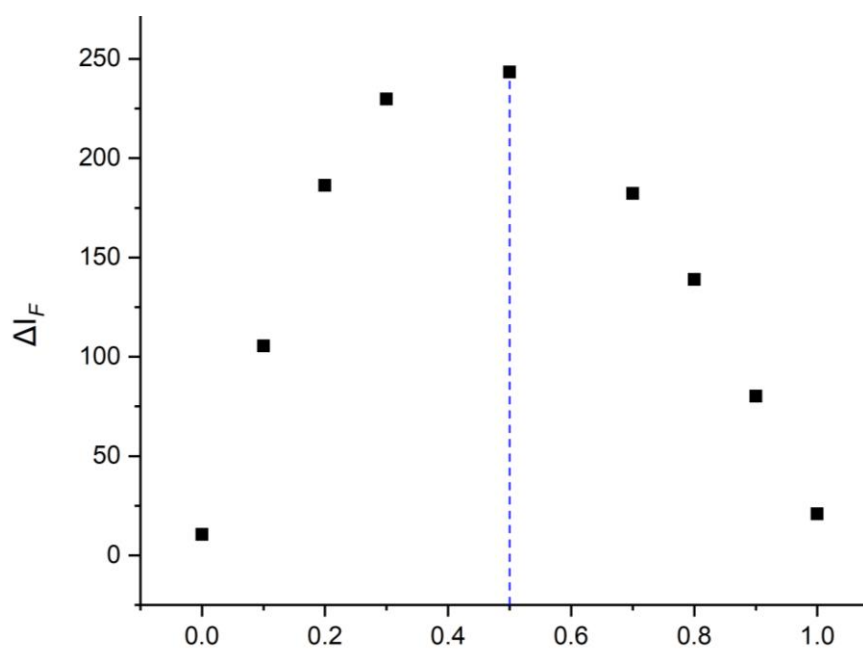

**Figure S14** Job plot showing the 1:1 stoichiometry of the complex between **B** and 2,2'-CBP4 in pH 7.4 buffer by plotting the  $\Delta I_F$  values against the mole fraction of **B** ( $[\mathbf{B}] + [2,2'\text{-CBP4}] = 1.0 \times 10^{-5} \text{ M}$ ) at 298 K.
